# Supplementary figures and images for: Foot pressure distribution during walking in young and old adults
Source: Springer Nature journal article supplement (doi:10.1186/1471-2318-5-8), 2005-05-19

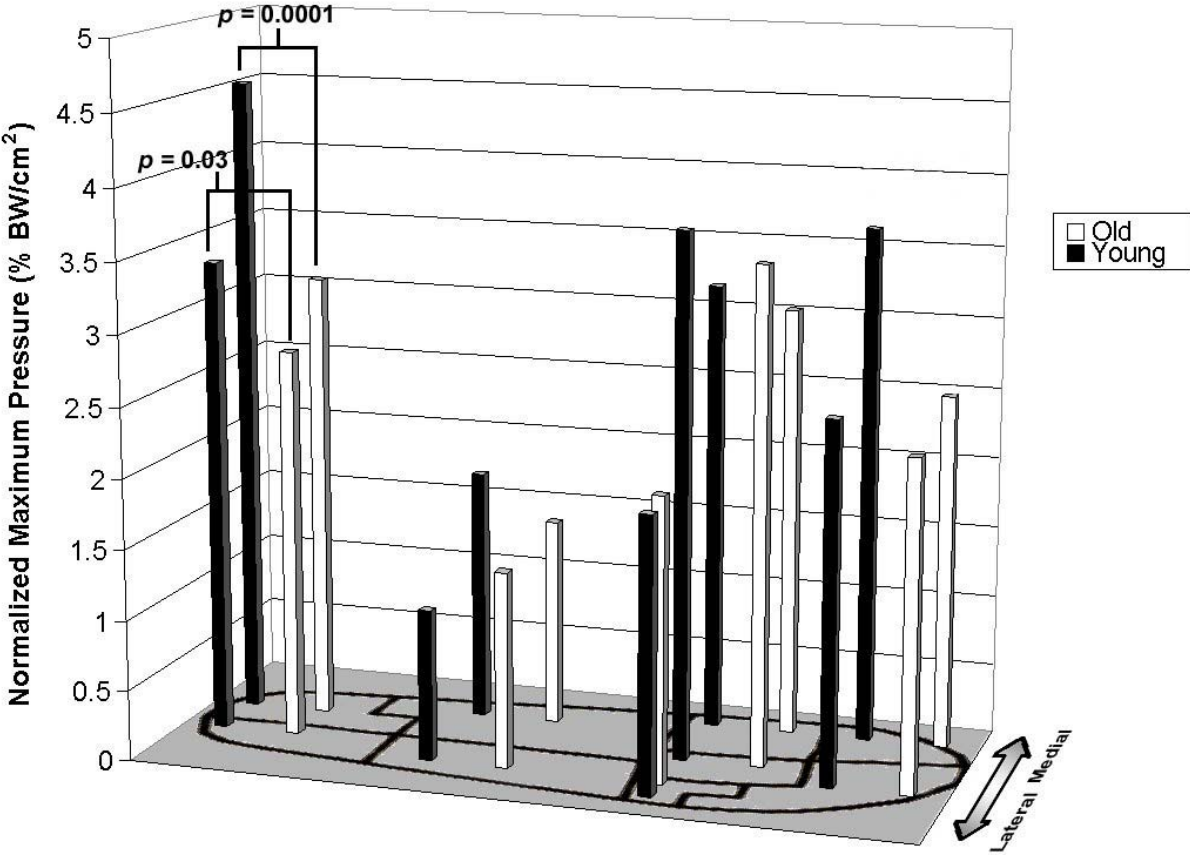

Supplement: 12877_2004_36_MOESM2_ESM.pdf [file 12877_2004_36_MOESM2_ESM.pdf]

**A**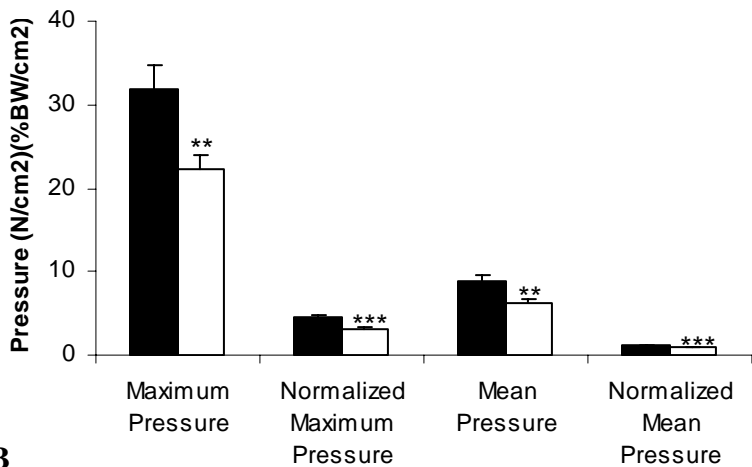**B**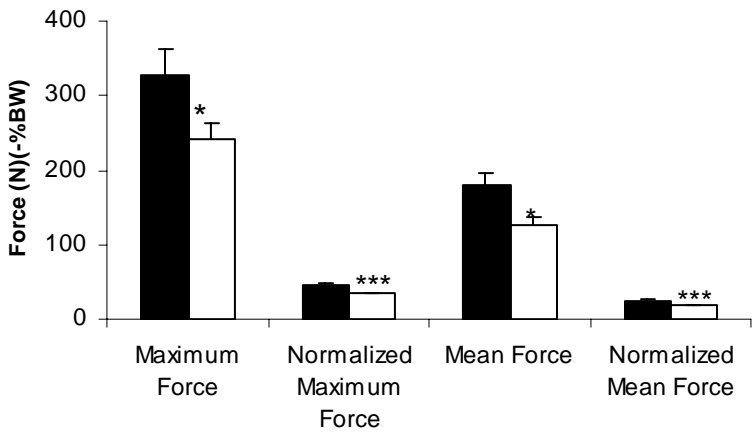

Supplement: 12877_2004_36_MOESM3_ESM.pdf [file 12877_2004_36_MOESM3_ESM.pdf]
